# Supplementary material for: Rescuing epileptic and behavioral alterations in a Dravet syndrome mouse model by inhibiting eukaryotic elongation factor 2 kinase (eEF2K)
Source: Springer Nature journal article supplement (doi:10.1186/s13229-021-00484-0), 2022-01-03
Supplement: MOESM1 [file 19991874]

### A Liver

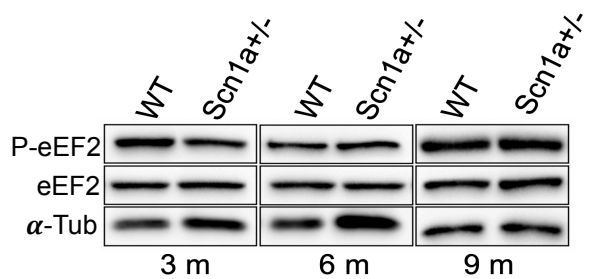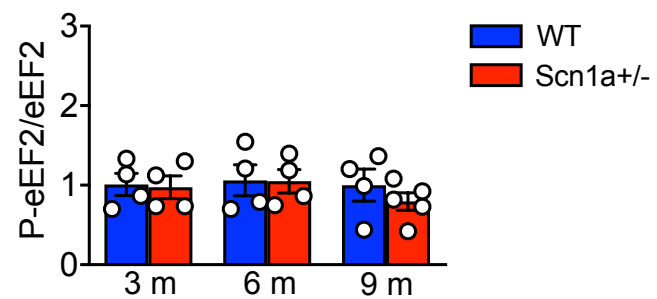

### B Kidney

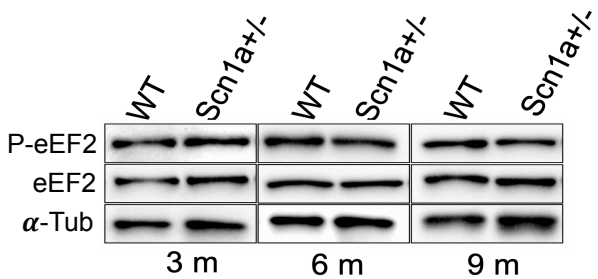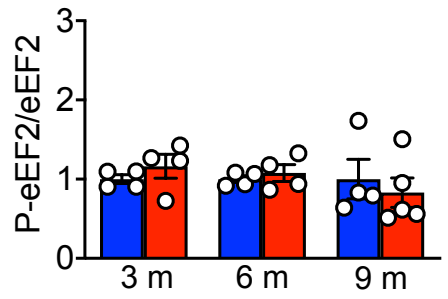

### C Heart

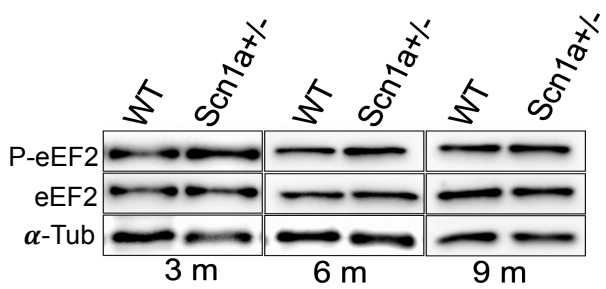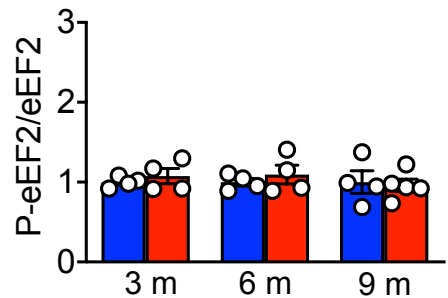

Supplementary Figure 1

**A**

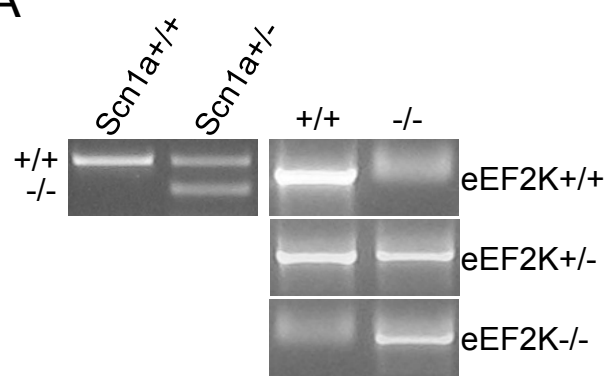

**B Hippocampus**

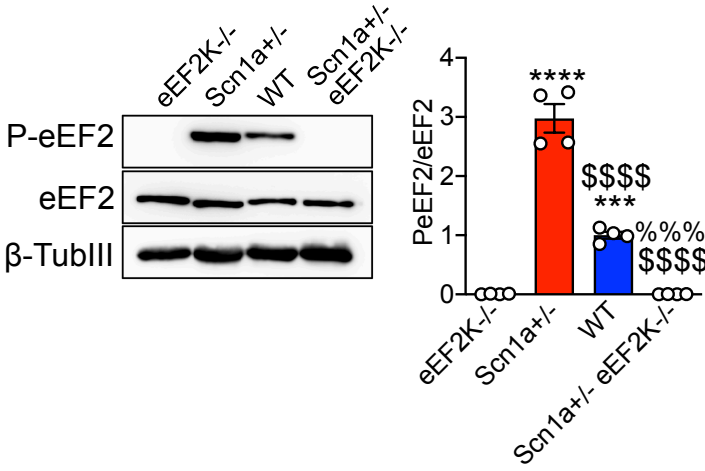

**Cerebral Cortex**

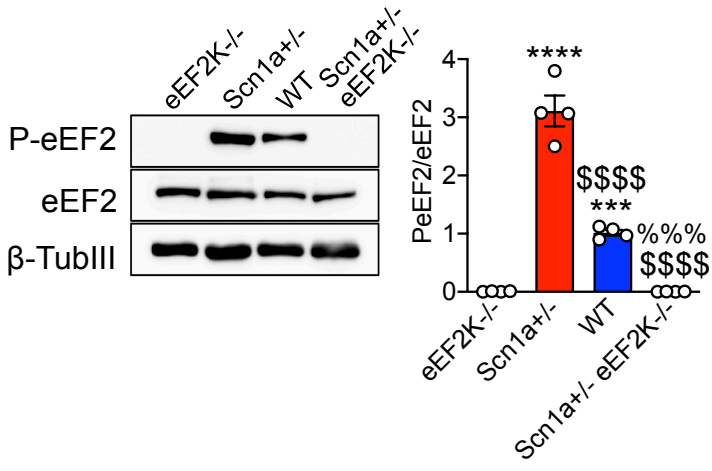

Supplementary Figure 2

# A Hippocampus

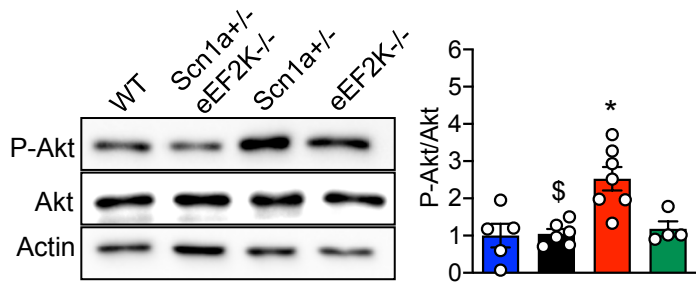

# Cerebral cortex

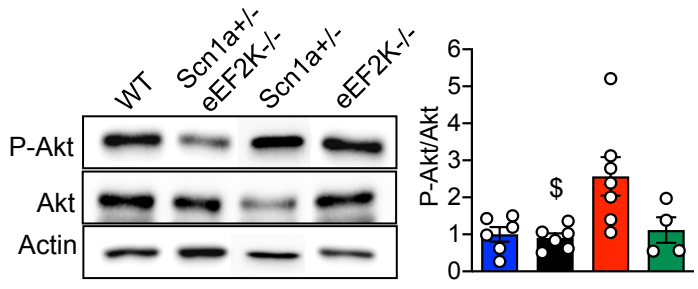

- WT
- Scn1a+/- eEF2K-/-
- Scn1a+/-
- eEF2K-/-

Supplementary Figure 3

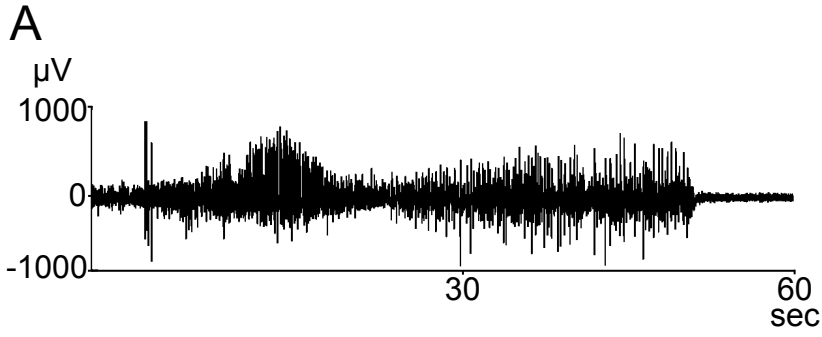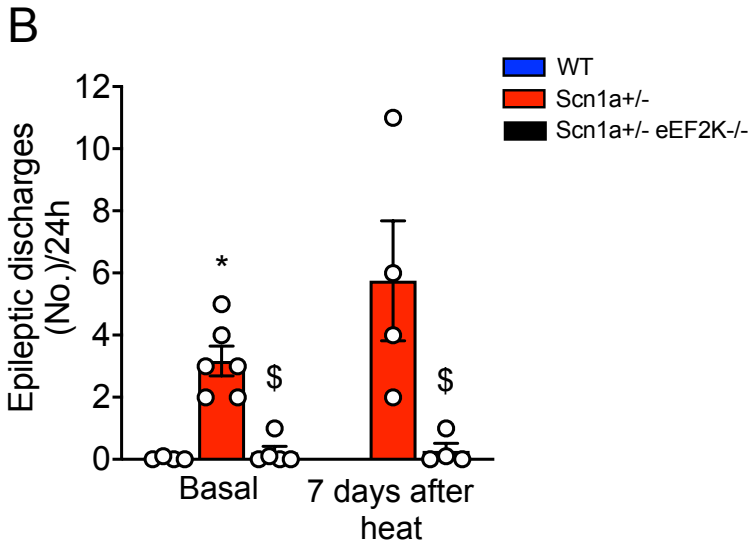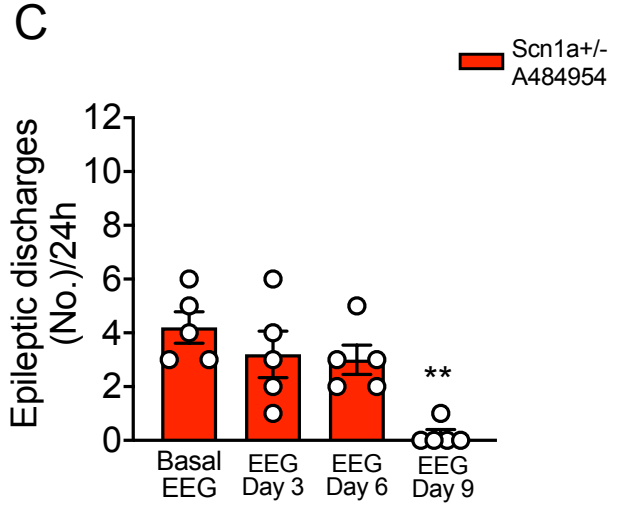

Supplementary Figure 4

**A** Balance beam      **B** Pole test

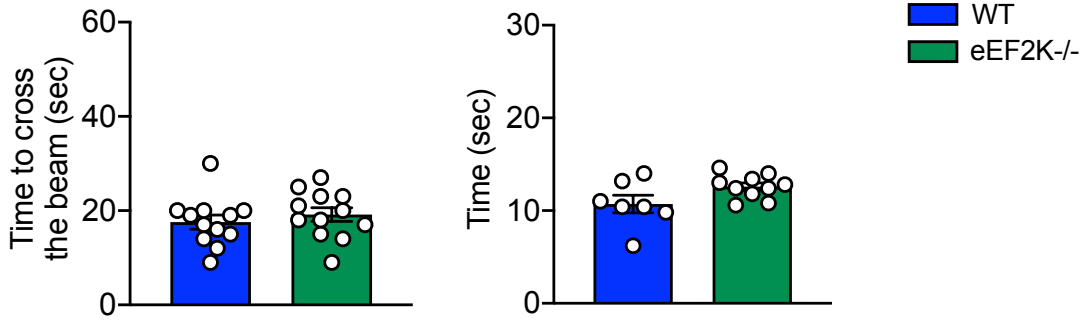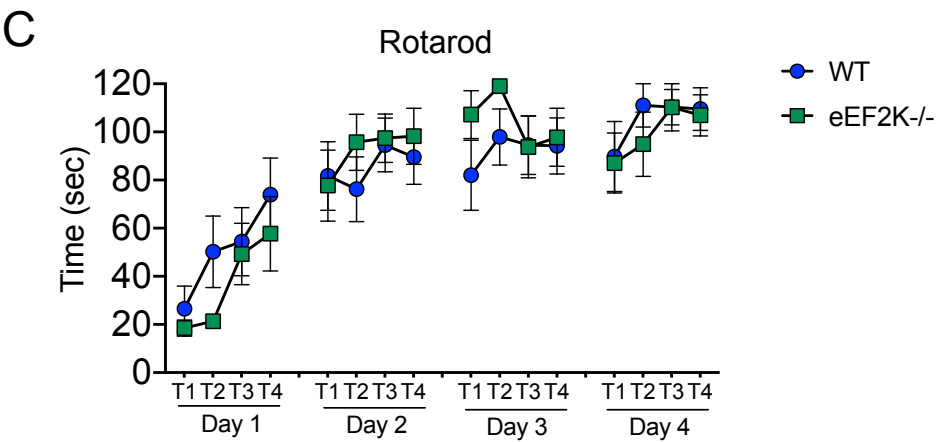

Supplementary Figure 5

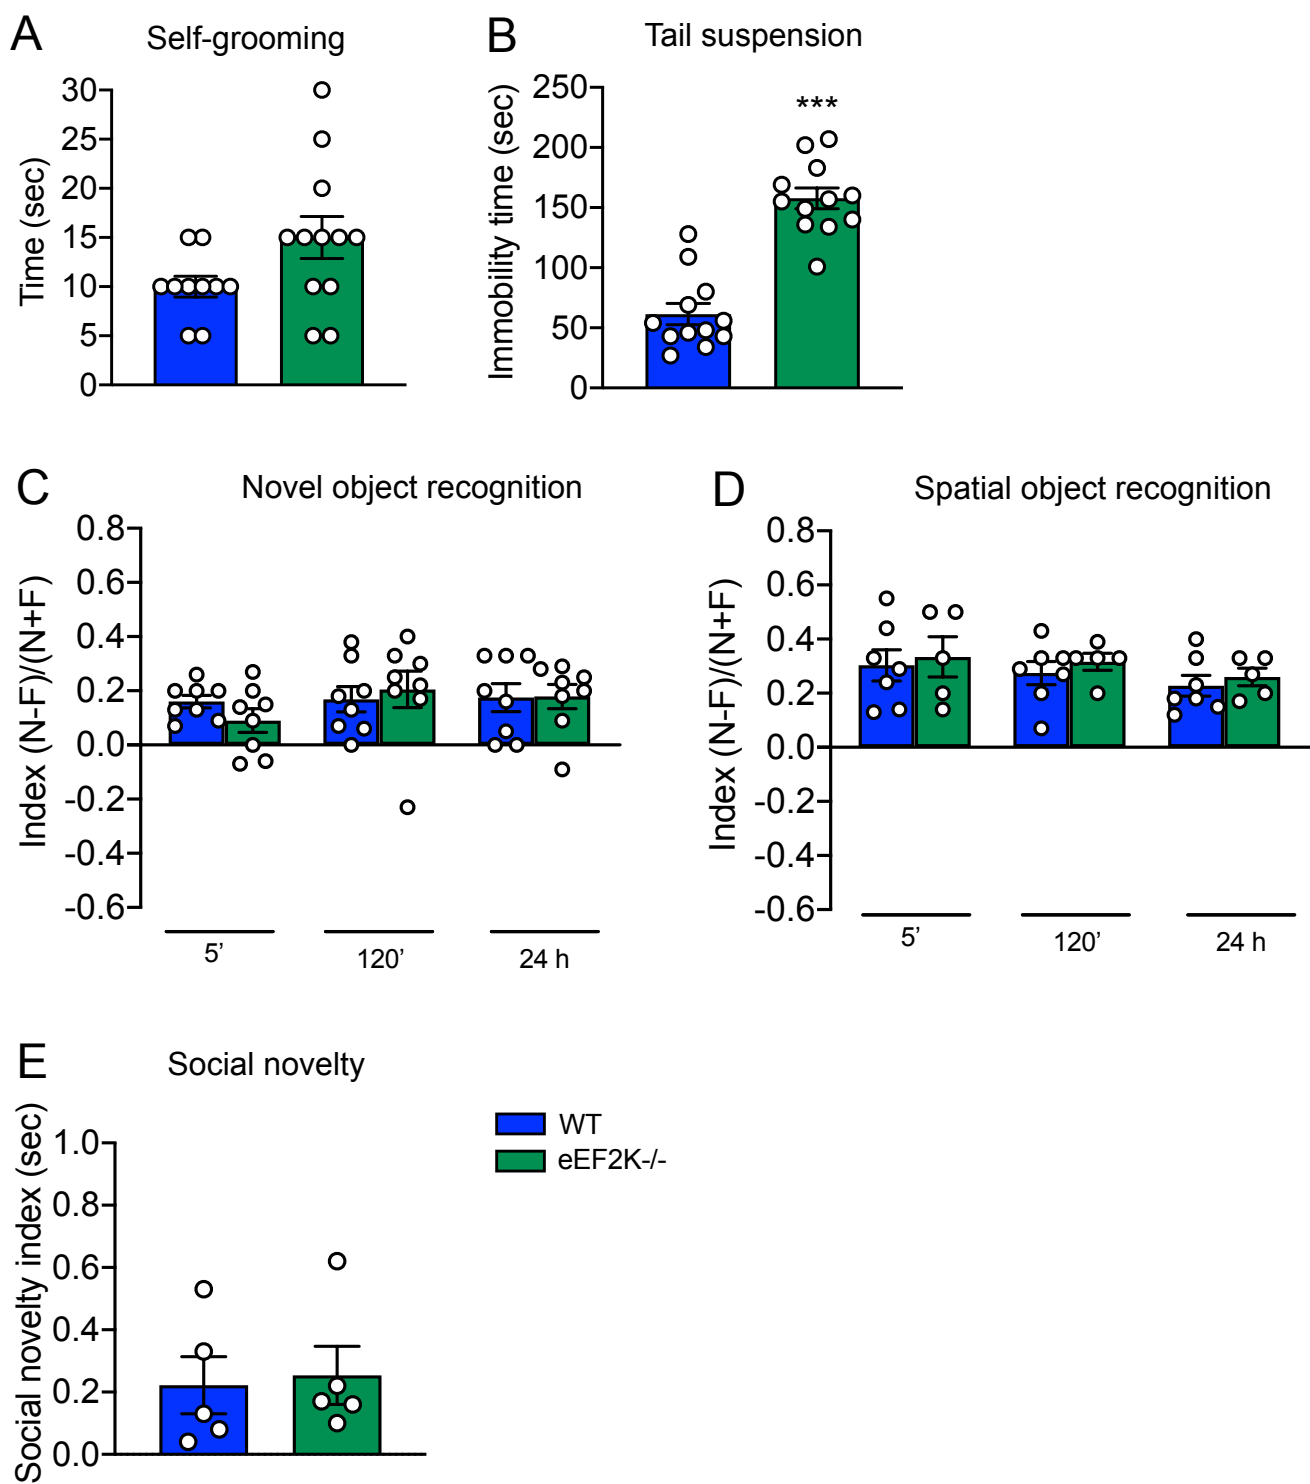

Supplementary Figure 6

A

Olfactory test

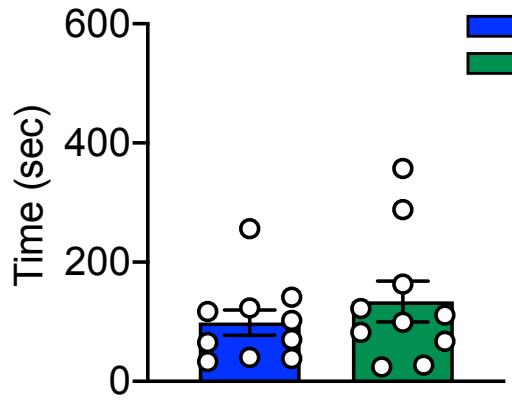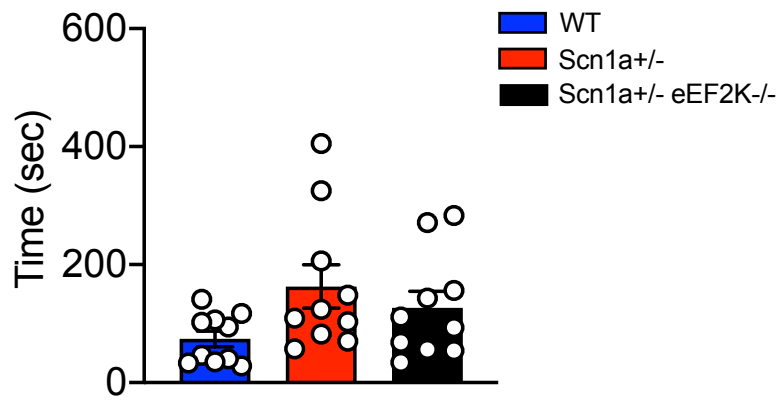

B

Visual cliff

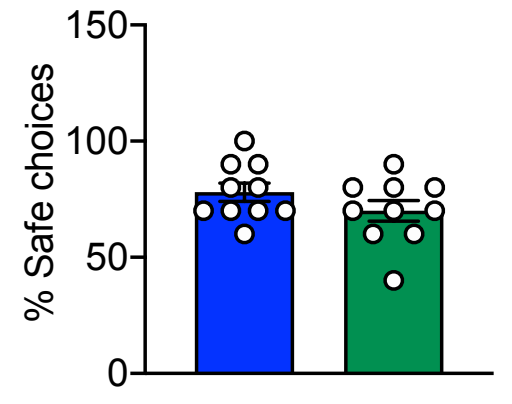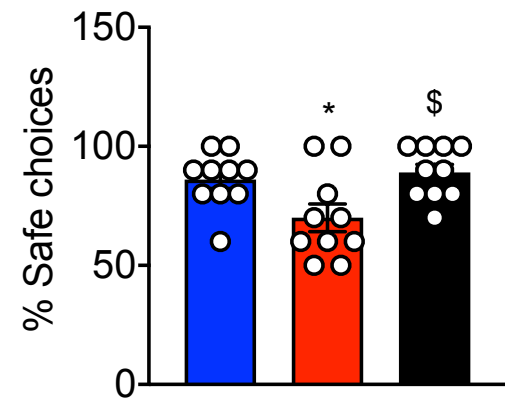

Supplementary Figure 7

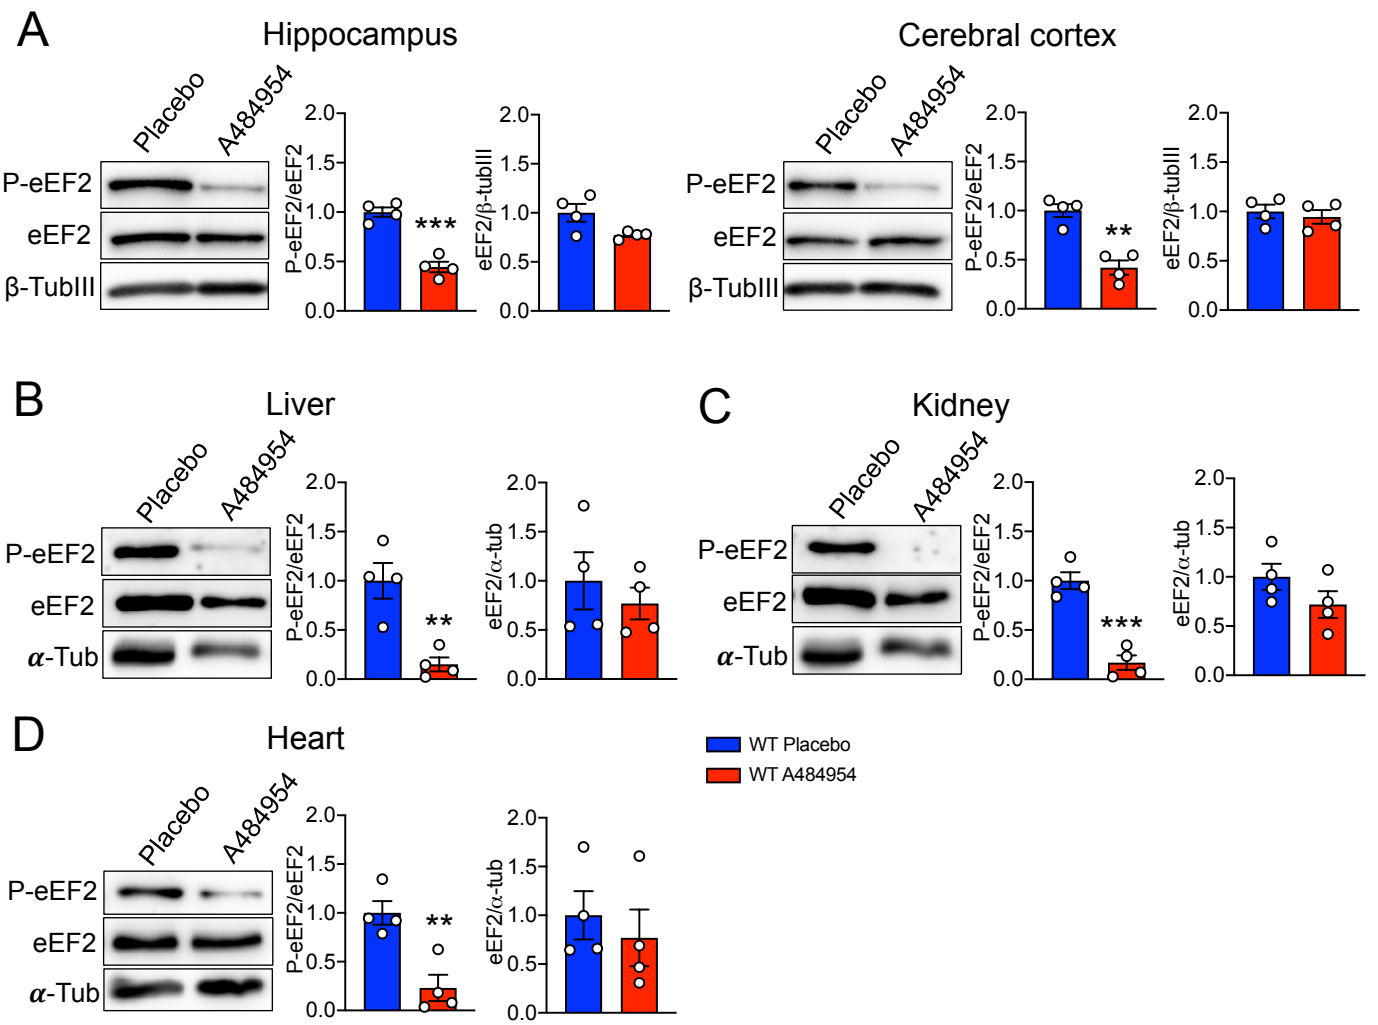

Supplementary Figure 8
